# Supplementary material for: Morphological and Phylogenetic Characterizations Reveal Five New Species of Astrothelium (Trypetheliales, Ascomycota) from China
Source: MDPI journal article supplement (doi:10.3390/jof8100994), 2022-09-22
Supplement: s1 [file s1]

We attached the figure below to display the shape of UV+ red spot by TLC in *Astrothelium jiangxiense* sp. nov.

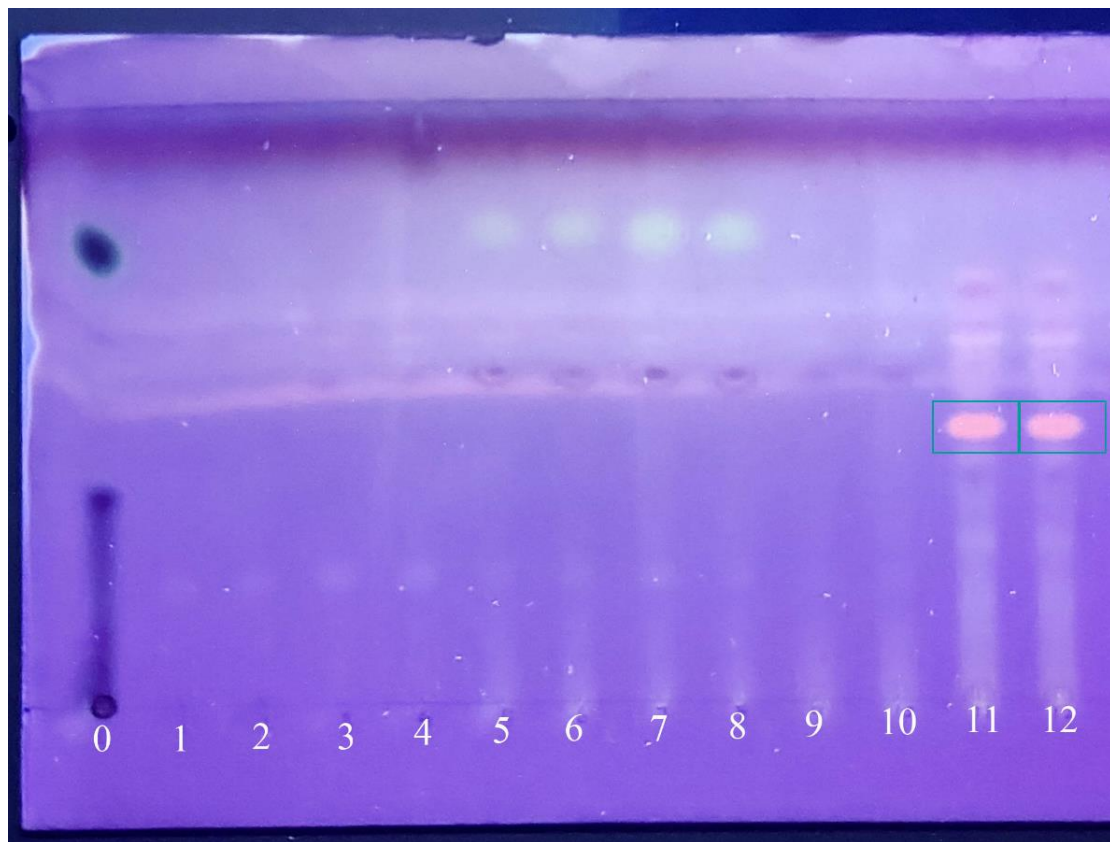

Supplementary 8. TLC test of the new speices *Astrothelium jiangxiense*. 0: standard substance (*Lethariella cladonioides*). 1-2: The bark without thallus of the new species *Astrothelium jiangxiense* as the control (1 is JX19042, and 2 is JX19053); 3-10: Other taxon in the experiment; 11-12: The new species *Astrothelium jiangxiense* (11 is JX19042, and 12 is JX19053). The UV red spot of *Astrothelium jiangxiense* in 11 and 12 were marked.
