# Supplementary material for: Morphological and Phylogenetic Characterizations Reveal Five New Species of Astrothelium (Trypetheliales, Ascomycota) from China
Source: MDPI journal article supplement (doi:10.3390/jof8100994), 2022-09-22
Supplement: s1 [file s1]

1. The top hits obtained after running a BLAST search of ITS for *Astrothelium jiangxiense* sp. nov. (holotype JX19042)

| Descriptions                                         | Graphic Summary                                                                                                  | Alignments           | Taxonomy  |             |             |         |           |         |            |
|------------------------------------------------------|------------------------------------------------------------------------------------------------------------------|----------------------|-----------|-------------|-------------|---------|-----------|---------|------------|
| Sequences producing significant alignments           |                                                                                                                  |                      |           |             |             |         |           |         |            |
| Download Select columns Show 100                     |                                                                                                                  |                      |           |             |             |         |           |         |            |
| select all 100 sequences selected                    |                                                                                                                  |                      |           |             |             |         |           |         |            |
| GenBank Graphics Distance tree of results MSA Viewer |                                                                                                                  |                      |           |             |             |         |           |         |            |
|                                                      | Description                                                                                                      | Scientific Name      | Max Score | Total Score | Query Cover | E value | Per Ident | Acc Len | Accession  |
|                                                      | Astrothelium neovariolosum genes for 18S rRNA ITS1 5.8S rRNA ITS2 28S rRNA partial and complete sequ...          | Astrothelium neo...  | 480       | 480         | 95%         | 2e-130  | 85.33%    | 545     | LC127391.1 |
|                                                      | Astrothelium neovariolosum genes for 18S rRNA ITS1 5.8S rRNA ITS2 28S rRNA partial and complete sequ...          | Astrothelium neo...  | 480       | 480         | 95%         | 2e-130  | 85.33%    | 544     | LC127390.1 |
|                                                      | Astrothelium macrostiolatum genes for 18S rRNA ITS1 5.8S rRNA ITS2 28S rRNA partial and complete sequ...         | Astrothelium mac...  | 477       | 477         | 97%         | 7e-130  | 84.90%    | 605     | LC127389.1 |
|                                                      | Astrothelium siamense genes for 18S rRNA ITS1 5.8S rRNA ITS2 28S rRNA partial and complete sequence J...         | Astrothelium sia...  | 452       | 452         | 90%         | 3e-122  | 85.20%    | 592     | LC127388.1 |
|                                                      | Astrothelium flavocoronatum genes for 18S rRNA ITS1 5.8S rRNA ITS2 28S rRNA partial and complete sequ...         | Astrothelium flav... | 451       | 451         | 90%         | 1e-121  | 85.65%    | 543     | AB758900.1 |
|                                                      | Astrothelium flavocoronatum genes for 18S rRNA ITS1 5.8S rRNA ITS2 28S rRNA partial and complete sequ...         | Astrothelium flav... | 444       | 444         | 90%         | 4e-120  | 85.45%    | 545     | LC127381.1 |
|                                                      | Astrothelium aenascens genes for 18S rRNA ITS1 5.8S rRNA ITS2 28S rRNA partial and complete sequence...          | Astrothelium aen...  | 442       | 442         | 89%         | 5e-119  | 84.41%    | 594     | LC127385.1 |
|                                                      | Astrothelium siamense genes for 18S rRNA ITS1 5.8S rRNA ITS2 28S rRNA partial and complete sequence J...         | Astrothelium sia...  | 439       | 439         | 89%         | 2e-118  | 84.86%    | 583     | LC127387.1 |
|                                                      | Astrothelium aenascens genes for 18S rRNA ITS1 5.8S rRNA ITS2 partial and complete sequence isolate HR           | Astrothelium aen...  | 433       | 433         | 87%         | 3e-116  | 84.52%    | 550     | LC127386.1 |
|                                                      | Trypethelium sp. DUKE 0000007 isolate AFTOL-ID 110 internal transcribed spacer 1 5.8S ribosomal RNA gene...      | Astrothelium cinn... | 427       | 427         | 88%         | 1e-114  | 83.41%    | 483     | DQ782839.1 |
|                                                      | Astrothelium neglectum genes for 18S rRNA ITS1 5.8S rRNA ITS2 28S rRNA partial and complete sequence j...        | Astrothelium negl... | 419       | 419         | 90%         | 2e-112  | 82.49%    | 552     | LC127394.1 |
|                                                      | Astrothelium neglectum genes for 18S rRNA ITS1 5.8S rRNA ITS2 28S rRNA partial and complete sequence j...        | Astrothelium negl... | 419       | 419         | 90%         | 2e-112  | 82.49%    | 568     | LC127393.1 |
|                                                      | Astrothelium neglectum genes for 18S rRNA ITS1 5.8S rRNA ITS2 28S rRNA partial and complete sequence j...        | Astrothelium negl... | 419       | 419         | 90%         | 2e-112  | 82.49%    | 567     | LC127392.1 |
|                                                      | Astrothelium sp. ZTY-2020a voucher LCUF GD19282 small subunit ribosomal RNA gene partial sequence intern         | Astrothelium sp...   | 408       | 408         | 90%         | 3e-109  | 83.29%    | 603     | MT948055.1 |
|                                                      | Astrothelium macrocarpum genes for 18S rRNA ITS1 5.8S rRNA ITS2 28S rRNA partial and complete sequen...          | Astrothelium mac...  | 407       | 484         | 88%         | 1e-108  | 86.57%    | 784     | LC127384.1 |
|                                                      | Astrothelium macrocarpum genes for 18S rRNA ITS1 5.8S rRNA ITS2 28S rRNA partial and complete sequen...          | Astrothelium mac...  | 407       | 484         | 88%         | 1e-108  | 86.57%    | 800     | LC127383.1 |
|                                                      | Astrothelium macrocarpum genes for 18S rRNA ITS1 5.8S rRNA ITS2 28S rRNA partial and complete sequen...          | Astrothelium mac...  | 407       | 484         | 88%         | 1e-108  | 86.57%    | 800     | LC127382.1 |
|                                                      | Astrothelium sp. ZTY-2020a voucher LCUF GD19156 small subunit ribosomal RNA gene partial sequence intern         | Astrothelium sp...   | 404       | 404         | 90%         | 1e-107  | 83.06%    | 602     | MT948056.1 |
|                                                      | Astrothelium macrocarpum TNS.YO12392 genes for 18S rRNA ITS1 5.8S rRNA ITS2 28S rRNA partial and co...           | Astrothelium mac...  | 403       | 475         | 94%         | 1e-107  | 84.43%    | 810     | LC573991.1 |
|                                                      | Astrothelium macrocarpum genes for 18S rRNA ITS1 5.8S rRNA ITS2 28S rRNA partial and complete sequence           | Astrothelium mac...  | 402       | 475         | 88%         | 4e-107  | 86.29%    | 799     | AB759880.1 |
|                                                      | Astrothelium macrocarpum voucher HMAS-L0146701 small subunit ribosomal RNA gene partial sequence intern          | Astrothelium mac...  | 402       | 475         | 88%         | 4e-107  | 86.29%    | 800     | MT948054.1 |
|                                                      | Astrothelium macrocarpum TNS.YO12285 genes for 18S rRNA ITS1 5.8S rRNA ITS2 28S rRNA partial and co...           | Astrothelium mac...  | 398       | 475         | 89%         | 5e-106  | 85.84%    | 726     | LC573990.1 |
|                                                      | Astrothelium sp. isolate JAM-177 small subunit ribosomal RNA gene partial sequence internal transcribed space... | Astrothelium sp...   | 393       | 393         | 89%         | 2e-104  | 82.35%    | 621     | MT553327.1 |
|                                                      | Trypethelium sp. isolate JAM-176 small subunit ribosomal RNA gene partial sequence internal transcribed space    | Trypethelium sp...   | 334       | 334         | 71%         | 5e-87   | 83.78%    | 622     | MT553326.1 |
|                                                      | Uncultured Capnodiales clone H93 18S ribosomal RNA gene partial sequence internal transcribed spacer 1 5.8...    | uncultured Capon...  | 326       | 326         | 68%         | 3e-84   | 84.28%    | 617     | JX317516.1 |
|                                                      | Marcelaria cumingii genes for 18S rRNA ITS1 5.8S rRNA ITS2 28S rRNA partial and complete sequence isola          | Marcelaria cumingii  | 286       | 286         | 49%         | 2e-72   | 88.03%    | 556     | LC034180.1 |

2. The top hits obtained after running a BLAST search of ITS for *Astrothelium luminothallinum* sp. nov. (holotype GZ18347)

| Descriptions                                         | Graphic Summary                                                                                               | Alignments           | Taxonomy  |             |             |         |           |          |            |
|------------------------------------------------------|---------------------------------------------------------------------------------------------------------------|----------------------|-----------|-------------|-------------|---------|-----------|----------|------------|
| Sequences producing significant alignments           |                                                                                                               |                      |           |             |             |         |           |          |            |
| Download Select columns Show 100                     |                                                                                                               |                      |           |             |             |         |           |          |            |
| select all 100 sequences selected                    |                                                                                                               |                      |           |             |             |         |           |          |            |
| GenBank Graphics Distance tree of results MSA Viewer |                                                                                                               |                      |           |             |             |         |           |          |            |
|                                                      | Description                                                                                                   | Scientific Name      | Max Score | Total Score | Query Cover | E value | Per Ident | Acc. Len | Accession  |
|                                                      | Astrothelium macrostiolatum genes for 18S rRNA ITS1 5.8S rRNA ITS2 28S rRNA partial and complete sequence     | Astrothelium mac...  | 551       | 551         | 100%        | 4e-152  | 87.28%    | 605      | LC127389.1 |
|                                                      | Astrothelium neovariolosum genes for 18S rRNA ITS1 5.8S rRNA ITS2 28S rRNA partial and complete sequence      | Astrothelium neo...  | 523       | 523         | 92%         | 2e-143  | 88.10%    | 545      | LC127391.1 |
|                                                      | Astrothelium neovariolosum genes for 18S rRNA ITS1 5.8S rRNA ITS2 28S rRNA partial and complete sequence      | Astrothelium neo...  | 523       | 523         | 92%         | 2e-143  | 88.10%    | 544      | LC127390.1 |
|                                                      | Astrothelium siamense genes for 18S rRNA ITS1 5.8S rRNA ITS2 28S rRNA partial and complete sequence           | Astrothelium sia...  | 517       | 517         | 98%         | 8e-142  | 86.50%    | 592      | LC127388.1 |
|                                                      | Astrothelium siamense genes for 18S rRNA ITS1 5.8S rRNA ITS2 28S rRNA partial and complete sequence           | Astrothelium sia...  | 512       | 512         | 100%        | 3e-140  | 86.09%    | 583      | LC127387.1 |
|                                                      | Astrothelium aenascens genes for 18S rRNA ITS1 5.8S rRNA ITS2 28S rRNA partial and complete sequence          | Astrothelium aen...  | 509       | 509         | 92%         | 1e-139  | 87.71%    | 594      | LC127385.1 |
|                                                      | Astrothelium aenascens genes for 18S rRNA ITS1 5.8S rRNA ITS2 partial and complete sequence isolate HR        | Astrothelium aen...  | 500       | 500         | 90%         | 6e-137  | 87.89%    | 550      | LC127386.1 |
|                                                      | Astrothelium sp. ZTY-2020a voucher LCUF GD19282 small subunit ribosomal RNA gene partial sequence internal    | Astrothelium sp...   | 452       | 452         | 92%         | 3e-122  | 85.31%    | 603      | MT948055.1 |
|                                                      | Astrothelium sp. ZTY-2020a voucher LCUF GD19156 small subunit ribosomal RNA gene partial sequence internal    | Astrothelium sp...   | 447       | 447         | 92%         | 1e-120  | 85.08%    | 602      | MT948056.1 |
|                                                      | Astrothelium flavocoronatum genes for 18S rRNA ITS1 5.8S rRNA ITS2 28S rRNA partial and complete sequence     | Astrothelium flav... | 425       | 425         | 90%         | 4e-114  | 83.69%    | 545      | LC127381.1 |
|                                                      | Astrothelium flavocoronatum genes for 18S rRNA ITS1 5.8S rRNA ITS2 28S rRNA partial and complete sequence     | Astrothelium flav... | 422       | 422         | 90%         | 5e-113  | 83.65%    | 543      | AB758900.1 |
|                                                      | Astrothelium neglectum genes for 18S rRNA ITS1 5.8S rRNA ITS2 28S rRNA partial and complete sequence          | Astrothelium negl... | 407       | 407         | 92%         | 1e-108  | 81.94%    | 552      | LC127394.1 |
|                                                      | Astrothelium neglectum genes for 18S rRNA ITS1 5.8S rRNA ITS2 28S rRNA partial and complete sequence          | Astrothelium negl... | 407       | 407         | 92%         | 1e-108  | 81.94%    | 568      | LC127393.1 |
|                                                      | Astrothelium neglectum genes for 18S rRNA ITS1 5.8S rRNA ITS2 28S rRNA partial and complete sequence          | Astrothelium negl... | 407       | 407         | 92%         | 1e-108  | 81.94%    | 567      | LC127392.1 |
|                                                      | Trypethelium sp. DUKE 0000007 isolate AFTOL-ID 110 internal transcribed spacer 1 5.8S ribosomal RNA gene      | Astrothelium cinn... | 402       | 402         | 89%         | 4e-107  | 82.82%    | 483      | DQ782839.1 |
|                                                      | Astrothelium sp. isolate JAM-177 small subunit ribosomal RNA gene partial sequence internal transcribed space | Astrothelium sp...   | 373       | 373         | 90%         | 2e-98   | 81.03%    | 621      | MT553327.1 |
|                                                      | Astrothelium macrocarpum genes for 18S rRNA ITS1 5.8S rRNA ITS2 28S rRNA partial and complete sequence        | Astrothelium mac...  | 369       | 428         | 73%         | 3e-97   | 90.41%    | 784      | LC127384.1 |
|                                                      | Astrothelium macrocarpum genes for 18S rRNA ITS1 5.8S rRNA ITS2 28S rRNA partial and complete sequence        | Astrothelium mac...  | 369       | 428         | 73%         | 3e-97   | 90.41%    | 800      | LC127383.1 |
|                                                      | Astrothelium macrocarpum genes for 18S rRNA ITS1 5.8S rRNA ITS2 28S rRNA partial and complete sequence        | Astrothelium mac...  | 369       | 428         | 73%         | 3e-97   | 90.41%    | 800      | LC127382.1 |
|                                                      | Astrothelium macrocarpum TNS.YO12392 genes for 18S rRNA ITS1 5.8S rRNA ITS2 28S rRNA partial and co           | Astrothelium mac...  | 369       | 432         | 73%         | 3e-97   | 90.41%    | 810      | LC573991.1 |
|                                                      | Astrothelium macrocarpum genes for 18S rRNA ITS1 5.8S rRNA ITS2 28S rRNA partial and complete sequence        | Astrothelium mac...  | 364       | 419         | 73%         | 1e-95   | 90.04%    | 799      | AB759880.1 |
|                                                      | Astrothelium macrocarpum voucher HMAS-L0146701 small subunit ribosomal RNA gene partial sequence internal     | Astrothelium mac...  | 364       | 419         | 73%         | 1e-95   | 90.04%    | 800      | MT948054.1 |
|                                                      | Astrothelium macrocarpum TNS.YO12285 genes for 18S rRNA ITS1 5.8S rRNA ITS2 28S rRNA partial and co           | Astrothelium mac...  | 361       | 420         | 78%         | 1e-94   | 87.41%    | 726      | LC573990.1 |
|                                                      | Trypethelium sp. isolate JAM-176 small subunit ribosomal RNA gene partial sequence internal transcribed space | Trypethelium sp...   | 356       | 356         | 72%         | 2e-93   | 85.12%    | 622      | MT553326.1 |
|                                                      | Uncultured Capnodiales clone H93 18S ribosomal RNA gene partial sequence internal transcribed spacer 1 5.8    | uncultured Capn...   | 332       | 332         | 67%         | 7e-86   | 86.04%    | 617      | JX317516.1 |
|                                                      | Marcelaria cumingii genes for 18S rRNA ITS1 5.8S rRNA ITS2 28S rRNA partial and complete sequence isolate     | Marcelaria cumingii  | 285       | 285         | 37%         | 9e-72   | 97.09%    | 556      | LC034180.1 |
|                                                      | Marcelaria cumingii genes for 18S rRNA ITS1 5.8S rRNA ITS2 28S rRNA partial and complete sequence isolate     | Marcelaria cumingii  | 285       | 285         | 37%         | 9e-72   | 97.09%    | 555      | LC034179.1 |

3. The top hits obtained after running a BLAST search of ITS for *Astrothelium pseudocrassum* sp. nov. (holotype GD19061)

| Descriptions                                         | Graphic Summary                                                                                                | Alignments            | Taxonomy  |             |             |         |            |          |            |
|------------------------------------------------------|----------------------------------------------------------------------------------------------------------------|-----------------------|-----------|-------------|-------------|---------|------------|----------|------------|
| Sequences producing significant alignments           |                                                                                                                |                       |           |             |             |         |            |          |            |
| Download Select columns Show 100                     |                                                                                                                |                       |           |             |             |         |            |          |            |
| Select all 100 sequences selected                    |                                                                                                                |                       |           |             |             |         |            |          |            |
| GenBank Graphics Distance tree of results MSA Viewer |                                                                                                                |                       |           |             |             |         |            |          |            |
|                                                      | Description                                                                                                    | Scientific Name       | Max Score | Total Score | Query Cover | E value | Per. Ident | Acc. Len | Accession  |
| <input checked="" type="checkbox"/>                  | Astrothelium macrostolatum genes for 18S rRNA ITS1 5.8S rRNA ITS2 28S rRNA partial and complete sequence       | Astrothelium mac...   | 579       | 579         | 100%        | 3e-160  | 88.98%     | 605      | LC127389.1 |
| <input checked="" type="checkbox"/>                  | Astrothelium neovariolosum genes for 18S rRNA ITS1 5.8S rRNA ITS2 28S rRNA partial and complete sequen         | Astrothelium neo...   | 543       | 543         | 96%         | 2e-149  | 88.01%     | 545      | LC127391.1 |
| <input checked="" type="checkbox"/>                  | Astrothelium neovariolosum genes for 18S rRNA ITS1 5.8S rRNA ITS2 28S rRNA partial and complete sequen         | Astrothelium neo...   | 543       | 543         | 96%         | 2e-149  | 88.01%     | 544      | LC127390.1 |
| <input checked="" type="checkbox"/>                  | Astrothelium siamense genes for 18S rRNA ITS1 5.8S rRNA ITS2 28S rRNA partial and complete sequence is         | Astrothelium sia...   | 527       | 527         | 97%         | 4e-145  | 87.22%     | 592      | LC127388.1 |
| <input checked="" type="checkbox"/>                  | Astrothelium aenascens genes for 18S rRNA ITS1 5.8S rRNA ITS2 28S rRNA partial and complete sequence i         | Astrothelium aen...   | 526       | 526         | 96%         | 2e-144  | 87.84%     | 594      | LC127385.1 |
| <input checked="" type="checkbox"/>                  | Astrothelium siamense genes for 18S rRNA ITS1 5.8S rRNA ITS2 28S rRNA partial and complete sequence is         | Astrothelium sia...   | 517       | 517         | 97%         | 8e-142  | 86.80%     | 583      | LC127387.1 |
| <input checked="" type="checkbox"/>                  | Astrothelium aenascens genes for 18S rRNA ITS1 5.8S rRNA ITS2 partial and complete sequence isolate HR         | Astrothelium aen...   | 517       | 517         | 93%         | 8e-142  | 88.02%     | 550      | LC127386.1 |
| <input checked="" type="checkbox"/>                  | Astrothelium flavocoronatum genes for 18S rRNA ITS1 5.8S rRNA ITS2 28S rRNA partial and complete sequ          | Astrothelium flav...  | 425       | 425         | 89%         | 4e-114  | 83.69%     | 543      | AB758900.1 |
| <input checked="" type="checkbox"/>                  | Astrothelium flavocoronatum genes for 18S rRNA ITS1 5.8S rRNA ITS2 28S rRNA partial and complete sequ          | Astrothelium flav...  | 423       | 423         | 89%         | 1e-113  | 83.49%     | 545      | LC127381.1 |
| <input checked="" type="checkbox"/>                  | Astrothelium sp. ZTY-2020a voucher LCUF GD19282 small subunit ribosomal RNA gene partial sequence intern       | Astrothelium sp...    | 392       | 392         | 91%         | 2e-104  | 82.13%     | 603      | MT948055.1 |
| <input checked="" type="checkbox"/>                  | Astrothelium sp. isolate JAM-177 small subunit ribosomal RNA gene partial sequence internal transcribed spacer | Astrothelium sp...    | 390       | 390         | 89%         | 8e-104  | 82.27%     | 621      | MT553327.1 |
| <input checked="" type="checkbox"/>                  | Astrothelium sp. ZTY-2020a voucher LCUF GD19156 small subunit ribosomal RNA gene partial sequence intern       | Astrothelium sp...    | 389       | 389         | 91%         | 3e-103  | 81.86%     | 602      | AB758900.1 |
| <input checked="" type="checkbox"/>                  | Trypethelium sp. isolate JAM-176 small subunit ribosomal RNA gene partial sequence internal transcribed spacer | Trypethelium sp...    | 379       | 379         | 72%         | 1e-100  | 87.13%     | 622      | MT553326.1 |
| <input checked="" type="checkbox"/>                  | Astrothelium neglectum genes for 18S rRNA ITS1 5.8S rRNA ITS2 28S rRNA partial and complete sequence i         | Astrothelium negl...  | 379       | 379         | 92%         | 1e-100  | 81.35%     | 552      | LC127394.1 |
| <input checked="" type="checkbox"/>                  | Astrothelium neglectum genes for 18S rRNA ITS1 5.8S rRNA ITS2 28S rRNA partial and complete sequence i         | Astrothelium negl...  | 379       | 379         | 92%         | 1e-100  | 81.35%     | 568      | LC127393.1 |
| <input checked="" type="checkbox"/>                  | Astrothelium neglectum genes for 18S rRNA ITS1 5.8S rRNA ITS2 28S rRNA partial and complete sequence i         | Astrothelium negl...  | 379       | 379         | 92%         | 1e-100  | 81.35%     | 567      | LC127392.1 |
| <input checked="" type="checkbox"/>                  | Astrothelium macrocarpum genes for 18S rRNA ITS1 5.8S rRNA ITS2 28S rRNA partial and complete sequenc          | Astrothelium mac...   | 362       | 435         | 85%         | 4e-95   | 85.45%     | 784      | LC127384.1 |
| <input checked="" type="checkbox"/>                  | Astrothelium macrocarpum genes for 18S rRNA ITS1 5.8S rRNA ITS2 28S rRNA partial and complete sequenc          | Astrothelium mac...   | 362       | 435         | 85%         | 4e-95   | 85.45%     | 800      | LC127383.1 |
| <input checked="" type="checkbox"/>                  | Astrothelium macrocarpum genes for 18S rRNA ITS1 5.8S rRNA ITS2 28S rRNA partial and complete sequenc          | Astrothelium mac...   | 362       | 435         | 85%         | 4e-95   | 85.45%     | 800      | LC127382.1 |
| <input checked="" type="checkbox"/>                  | Astrothelium macrocarpum genes for 18S rRNA ITS1 5.8S rRNA ITS2 28S rRNA partial and complete sequence         | Astrothelium mac...   | 358       | 426         | 85%         | 5e-94   | 85.15%     | 799      | AB758980.1 |
| <input checked="" type="checkbox"/>                  | Astrothelium macrocarpum voucher HMAS-L0146701 small subunit ribosomal RNA gene partial sequence intern        | Astrothelium mac...   | 358       | 426         | 85%         | 5e-94   | 85.15%     | 800      | MT948054.1 |
| <input checked="" type="checkbox"/>                  | Trypethelium sp. DUKE 0000007 isolate AFTOL-ID 110 internal transcribed spacer 1 5.8S ribosomal RNA gene a     | Astrothelium cinn...  | 356       | 356         | 87%         | 2e-93   | 80.85%     | 483      | DQ782839.1 |
| <input checked="" type="checkbox"/>                  | Astrothelium macrocarpum TNS.YO12285 genes for 18S rRNA ITS1 5.8S rRNA ITS2 28S rRNA partial and co            | Astrothelium mac...   | 355       | 428         | 85%         | 6e-93   | 84.98%     | 726      | LC573990.1 |
| <input checked="" type="checkbox"/>                  | Astrothelium macrocarpum TNS.YO12392 genes for 18S rRNA ITS1 5.8S rRNA ITS2 28S rRNA partial and co            | Astrothelium mac...   | 352       | 420         | 85%         | 7e-92   | 84.80%     | 810      | LC573991.1 |
| <input checked="" type="checkbox"/>                  | Uncultured Capnodiales clone H/93 18S ribosomal RNA gene partial sequence internal transcribed spacer 1 5.8    | uncultured Capn...    | 345       | 345         | 66%         | 3e-90   | 86.60%     | 617      | JX317516.1 |
| <input checked="" type="checkbox"/>                  | Marcelaria cumingii genes for 18S rRNA ITS1 5.8S rRNA ITS2 28S rRNA partial and complete sequence isolat       | Marcelaria cumingi... | 307       | 307         | 67%         | 8e-79   | 82.81%     | 555      | LC034179.1 |
| <input checked="" type="checkbox"/>                  | Marcelaria cumingii genes for 18S rRNA ITS1 5.8S rRNA ITS2 28S rRNA partial and complete sequence isolat       | Marcelaria cumingi... | 303       | 303         | 67%         | 3e-77   | 82.50%     | 556      | LC034180.1 |

4. The top hits obtained after running a BLAST search of ITS for *Astrothelium subeustominspersum* sp. nov. (holotype HMAS-L 0152001)

| Descriptions                                         | Graphic Summary                                                                                                               | Alignments            | Taxonomy  |             |             |         |           |          |            |
|------------------------------------------------------|-------------------------------------------------------------------------------------------------------------------------------|-----------------------|-----------|-------------|-------------|---------|-----------|----------|------------|
| Sequences producing significant alignments           |                                                                                                                               |                       |           |             |             |         |           |          |            |
| Download Select columns Show 100                     |                                                                                                                               |                       |           |             |             |         |           |          |            |
| select all 100 sequences selected                    |                                                                                                                               |                       |           |             |             |         |           |          |            |
| GenBank Graphics Distance tree of results MSA Viewer |                                                                                                                               |                       |           |             |             |         |           |          |            |
|                                                      | Description                                                                                                                   | Scientific Name       | Max Score | Total Score | Query Cover | E value | Per Ident | Acc. Len | Accession  |
| <input checked="" type="checkbox"/>                  | Astrothelium macrostolatum genes for 18S rRNA ITS1 5.8S rRNA ITS2 28S rRNA partial and complete sequence                      | Astrothelium mac...   | 508       | 508         | 95%         | 4e-139  | 85.78%    | 605      | LC127389.1 |
| <input checked="" type="checkbox"/>                  | Astrothelium neovariolosum genes for 18S rRNA ITS1 5.8S rRNA ITS2 28S rRNA partial and complete sequence                      | Astrothelium neo...   | 490       | 490         | 95%         | 1e-133  | 85.49%    | 545      | LC127391.1 |
| <input checked="" type="checkbox"/>                  | Astrothelium neovariolosum genes for 18S rRNA ITS1 5.8S rRNA ITS2 28S rRNA partial and complete sequence                      | Astrothelium neo...   | 490       | 490         | 95%         | 1e-133  | 85.49%    | 544      | LC127390.1 |
| <input checked="" type="checkbox"/>                  | Astrothelium aenascens genes for 18S rRNA ITS1 5.8S rRNA ITS2 28S rRNA partial and complete sequence                          | Astrothelium aen...   | 468       | 468         | 91%         | 4e-127  | 85.58%    | 594      | LC127385.1 |
| <input checked="" type="checkbox"/>                  | Astrothelium aenascens genes for 18S rRNA ITS1 5.8S rRNA ITS2 partial and complete sequence isolate HR                        | Astrothelium aen...   | 459       | 459         | 91%         | 2e-124  | 85.11%    | 550      | LC127386.1 |
| <input checked="" type="checkbox"/>                  | Astrothelium siamense genes for 18S rRNA ITS1 5.8S rRNA ITS2 28S rRNA partial and complete sequence                           | Astrothelium sia...   | 449       | 449         | 92%         | 3e-121  | 84.78%    | 583      | LC127387.1 |
| <input checked="" type="checkbox"/>                  | Astrothelium siamense genes for 18S rRNA ITS1 5.8S rRNA ITS2 28S rRNA partial and complete sequence                           | Astrothelium sia...   | 433       | 433         | 92%         | 3e-116  | 83.29%    | 592      | LC127388.1 |
| <input checked="" type="checkbox"/>                  | Astrothelium flavocoronatum genes for 18S rRNA ITS1 5.8S rRNA ITS2 28S rRNA partial and complete sequence                     | Astrothelium flav...  | 431       | 431         | 89%         | 9e-116  | 83.81%    | 543      | AB758900.1 |
| <input checked="" type="checkbox"/>                  | Astrothelium flavocoronatum genes for 18S rRNA ITS1 5.8S rRNA ITS2 28S rRNA partial and complete sequence                     | Astrothelium flav...  | 425       | 425         | 89%         | 4e-114  | 83.61%    | 545      | LC127381.1 |
| <input checked="" type="checkbox"/>                  | Astrothelium sp. isolate JAM-177 small subunit ribosomal RNA gene partial sequence internal transcribed spacer                | Astrothelium sp...    | 393       | 393         | 88%         | 2e-104  | 82.46%    | 621      | MT553327.1 |
| <input checked="" type="checkbox"/>                  | Astrothelium macrocarpum genes for 18S rRNA ITS1 5.8S rRNA ITS2 28S rRNA partial and complete sequence                        | Astrothelium mac...   | 379       | 436         | 90%         | 1e-100  | 84.17%    | 784      | LC127384.1 |
| <input checked="" type="checkbox"/>                  | Astrothelium macrocarpum genes for 18S rRNA ITS1 5.8S rRNA ITS2 28S rRNA partial and complete sequence                        | Astrothelium mac...   | 379       | 436         | 90%         | 1e-100  | 84.17%    | 800      | LC127383.1 |
| <input checked="" type="checkbox"/>                  | Astrothelium macrocarpum genes for 18S rRNA ITS1 5.8S rRNA ITS2 28S rRNA partial and complete sequence                        | Astrothelium mac...   | 379       | 436         | 90%         | 1e-100  | 84.17%    | 800      | LC127382.1 |
| <input checked="" type="checkbox"/>                  | Astrothelium macrocarpum TNS.YO12392 genes for 18S rRNA ITS1 5.8S rRNA ITS2 28S rRNA partial and complete sequence            | Astrothelium mac...   | 377       | 438         | 84%         | 2e-99   | 86.20%    | 810      | LC573991.1 |
| <input checked="" type="checkbox"/>                  | Astrothelium macrocarpum genes for 18S rRNA ITS1 5.8S rRNA ITS2 28S rRNA partial and complete sequence                        | Astrothelium mac...   | 375       | 375         | 77%         | 6e-99   | 83.89%    | 799      | AB758980.1 |
| <input checked="" type="checkbox"/>                  | Astrothelium macrocarpum voucher HMAS-L0146701 small subunit ribosomal RNA gene partial sequence internal transcribed spacer  | Astrothelium mac...   | 375       | 375         | 77%         | 6e-99   | 83.89%    | 800      | MT948054.1 |
| <input checked="" type="checkbox"/>                  | Astrothelium sp. ZTY-2020a voucher LCUF GD19282 small subunit ribosomal RNA gene partial sequence internal transcribed spacer | Astrothelium sp...    | 371       | 371         | 91%         | 7e-98   | 81.82%    | 603      | MT948055.1 |
| <input checked="" type="checkbox"/>                  | Astrothelium macrocarpum TNS.YO12285 genes for 18S rRNA ITS1 5.8S rRNA ITS2 28S rRNA partial and complete sequence            | Astrothelium mac...   | 369       | 425         | 84%         | 3e-97   | 85.37%    | 726      | LC573990.1 |
| <input checked="" type="checkbox"/>                  | Astrothelium sp. ZTY-2020a voucher LCUF GD19156 small subunit ribosomal RNA gene partial sequence internal transcribed spacer | Astrothelium sp...    | 367       | 367         | 91%         | 9e-97   | 81.59%    | 602      | MT948056.1 |
| <input checked="" type="checkbox"/>                  | Trypethelium sp. isolate JAM-176 small subunit ribosomal RNA gene partial sequence internal transcribed spacer                | Trypethelium sp...    | 352       | 352         | 71%         | 7e-92   | 84.64%    | 622      | MT553326.1 |
| <input checked="" type="checkbox"/>                  | Astrothelium neglectum genes for 18S rRNA ITS1 5.8S rRNA ITS2 28S rRNA partial and complete sequence                          | Astrothelium negl...  | 347       | 347         | 91%         | 9e-91   | 78.33%    | 552      | LC127394.1 |
| <input checked="" type="checkbox"/>                  | Astrothelium neglectum genes for 18S rRNA ITS1 5.8S rRNA ITS2 28S rRNA partial and complete sequence                          | Astrothelium negl...  | 347       | 347         | 91%         | 9e-91   | 78.33%    | 568      | LC127393.1 |
| <input checked="" type="checkbox"/>                  | Astrothelium neglectum genes for 18S rRNA ITS1 5.8S rRNA ITS2 28S rRNA partial and complete sequence                          | Astrothelium negl...  | 347       | 347         | 91%         | 9e-91   | 78.33%    | 567      | LC127392.1 |
| <input checked="" type="checkbox"/>                  | Uncultured Capnodiales clone H/93 18S ribosomal RNA gene partial sequence internal transcribed spacer 1 5.8S                  | uncultured Capn...    | 334       | 334         | 66%         | 2e-86   | 85.48%    | 617      | JX317516.1 |
| <input checked="" type="checkbox"/>                  | Trypethelium sp. DUKE 0000007 isolate AFTOL-ID 110 internal transcribed spacer 1 5.8S ribosomal RNA gene                      | Astrothelium cinn...  | 330       | 330         | 87%         | 2e-85   | 78.44%    | 483      | DQ782839.1 |
| <input checked="" type="checkbox"/>                  | Uncultured fungus clone 107A66967 18S ribosomal RNA gene partial sequence internal transcribed spacer 1                       | uncultured fungus...  | 286       | 286         | 40%         | 2e-72   | 94.54%    | 383      | JX333079.1 |
| <input checked="" type="checkbox"/>                  | Marcelaria cumingii genes for 18S rRNA ITS1 5.8S rRNA ITS2 28S rRNA partial and complete sequence isolate                     | Marcelaria cumingi... | 284       | 284         | 43%         | 9e-72   | 91.67%    | 555      | LC034179.1 |

## 5. The top hits obtained after running a BLAST search of ITS for *Astrothelium subrufescens* sp. nov. (holotype GD19067)

| Descriptions                                                                                                                                                          | Graphic Summary                      | Alignments | Taxonomy    |             |         |            |          |                            |
|-----------------------------------------------------------------------------------------------------------------------------------------------------------------------|--------------------------------------|------------|-------------|-------------|---------|------------|----------|----------------------------|
| Sequences producing significant alignments                                                                                                                            |                                      |            |             |             |         |            |          |                            |
| Download                                                                                                                                                              |                                      |            |             |             |         |            |          |                            |
| Select columns                                                                                                                                                        |                                      |            |             |             |         |            |          |                            |
| Show 100                                                                                                                                                              |                                      |            |             |             |         |            |          |                            |
| <a href="#">GenBank</a> <a href="#">Graphics</a> <a href="#">Distance tree of results</a> <a href="#">MSA Viewer</a>                                                  |                                      |            |             |             |         |            |          |                            |
| <input checked="" type="checkbox"/> select all                                                                                                                        | 100 sequences selected               |            |             |             |         |            |          |                            |
| Description                                                                                                                                                           | Scientific Name                      | Max Score  | Total Score | Query Cover | E value | Per. Ident | Acc. Len | Accession                  |
| <input checked="" type="checkbox"/> <a href="#">Astrothelium macrostoliatum</a> genes for 18S rRNA ITS1 5.8S rRNA ITS2 28S rRNA partial and complete sequen...        | <a href="#">Astrothelium mac...</a>  | 605        | 605         | 100%        | 2e-168  | 90.06%     | 605      | <a href="#">LC127389.1</a> |
| <input checked="" type="checkbox"/> <a href="#">Astrothelium neovariolosum</a> genes for 18S rRNA ITS1 5.8S rRNA ITS2 28S rRNA partial and complete sequenc...        | <a href="#">Astrothelium neo...</a>  | 578        | 578         | 100%        | 3e-160  | 88.72%     | 545      | <a href="#">LC127391.1</a> |
| <input checked="" type="checkbox"/> <a href="#">Astrothelium neovariolosum</a> genes for 18S rRNA ITS1 5.8S rRNA ITS2 28S rRNA partial and complete sequenc...        | <a href="#">Astrothelium neo...</a>  | 578        | 578         | 100%        | 3e-160  | 88.72%     | 544      | <a href="#">LC127390.1</a> |
| <input checked="" type="checkbox"/> <a href="#">Astrothelium siamense</a> genes for 18S rRNA ITS1 5.8S rRNA ITS2 28S rRNA partial and complete sequence iso...        | <a href="#">Astrothelium sia...</a>  | 535        | 535         | 96%         | 3e-147  | 87.64%     | 592      | <a href="#">LC127388.1</a> |
| <input checked="" type="checkbox"/> <a href="#">Astrothelium aenascens</a> genes for 18S rRNA ITS1 5.8S rRNA ITS2 28S rRNA partial and complete sequence is...        | <a href="#">Astrothelium aen...</a>  | 519        | 519         | 100%        | 2e-142  | 86.39%     | 594      | <a href="#">LC127385.1</a> |
| <input checked="" type="checkbox"/> <a href="#">Astrothelium siamense</a> genes for 18S rRNA ITS1 5.8S rRNA ITS2 28S rRNA partial and complete sequence iso...        | <a href="#">Astrothelium sia...</a>  | 509        | 509         | 95%         | 1e-139  | 86.82%     | 583      | <a href="#">LC127387.1</a> |
| <input checked="" type="checkbox"/> <a href="#">Astrothelium aenascens</a> genes for 18S rRNA ITS1 5.8S rRNA ITS2 partial and complete sequence isolate HRK98         | <a href="#">Astrothelium aen...</a>  | 509        | 509         | 93%         | 1e-139  | 87.53%     | 550      | <a href="#">LC127386.1</a> |
| <input checked="" type="checkbox"/> <a href="#">Astrothelium flavocoronatum</a> genes for 18S rRNA ITS1 5.8S rRNA ITS2 28S rRNA partial and complete sequence         | <a href="#">Astrothelium flav...</a> | 435        | 435         | 89%         | 2e-117  | 84.09%     | 543      | <a href="#">AB758900.1</a> |
| <input checked="" type="checkbox"/> <a href="#">Astrothelium flavocoronatum</a> genes for 18S rRNA ITS1 5.8S rRNA ITS2 28S rRNA partial and complete sequen...        | <a href="#">Astrothelium flav...</a> | 434        | 434         | 89%         | 7e-117  | 83.89%     | 545      | <a href="#">LC127381.1</a> |
| <input checked="" type="checkbox"/> <a href="#">Astrothelium neglectum</a> genes for 18S rRNA ITS1 5.8S rRNA ITS2 28S rRNA partial and complete sequence is...        | <a href="#">Astrothelium negl...</a> | 400        | 400         | 94%         | 2e-106  | 81.54%     | 552      | <a href="#">LC127394.1</a> |
| <input checked="" type="checkbox"/> <a href="#">Astrothelium neglectum</a> genes for 18S rRNA ITS1 5.8S rRNA ITS2 28S rRNA partial and complete sequence is...        | <a href="#">Astrothelium negl...</a> | 400        | 400         | 94%         | 2e-106  | 81.54%     | 568      | <a href="#">LC127393.1</a> |
| <input checked="" type="checkbox"/> <a href="#">Astrothelium neglectum</a> genes for 18S rRNA ITS1 5.8S rRNA ITS2 28S rRNA partial and complete sequence is...        | <a href="#">Astrothelium negl...</a> | 400        | 400         | 94%         | 2e-106  | 81.54%     | 567      | <a href="#">LC127392.1</a> |
| <input checked="" type="checkbox"/> <a href="#">Astrothelium</a> sp. ZTY-2020a voucher LCUF GD19156 small subunit ribosomal RNA gene partial sequence internal...     | <a href="#">Astrothelium sp...</a>   | 398        | 398         | 89%         | 5e-106  | 82.51%     | 602      | <a href="#">MT948056.1</a> |
| <input checked="" type="checkbox"/> <a href="#">Astrothelium</a> sp. ZTY-2020a voucher LCUF GD19282 small subunit ribosomal RNA gene partial sequence internal...     | <a href="#">Astrothelium sp...</a>   | 398        | 398         | 89%         | 5e-106  | 82.55%     | 603      | <a href="#">MT948055.1</a> |
| <input checked="" type="checkbox"/> <a href="#">Trypethelium</a> sp. DUKE 0000007 isolate AFTOL-ID 110 internal transcribed spacer 1 5.8S ribosomal RNA gene a...     | <a href="#">Astrothelium cinn...</a> | 396        | 396         | 92%         | 2e-105  | 81.53%     | 483      | <a href="#">DQ782839.1</a> |
| <input checked="" type="checkbox"/> <a href="#">Astrothelium</a> sp. isolate JAM-177 small subunit ribosomal RNA gene partial sequence internal transcribed spacer... | <a href="#">Astrothelium sp...</a>   | 390        | 390         | 89%         | 8e-104  | 82.27%     | 621      | <a href="#">MT553327.1</a> |
| <input checked="" type="checkbox"/> <a href="#">Trypethelium</a> sp. isolate JAM-176 small subunit ribosomal RNA gene partial sequence internal transcribed spacer... | <a href="#">Trypethelium sp...</a>   | 386        | 386         | 71%         | 3e-102  | 87.35%     | 622      | <a href="#">MT553326.1</a> |
| <input checked="" type="checkbox"/> <a href="#">Astrothelium macrocarpum</a> genes for 18S rRNA ITS1 5.8S rRNA ITS2 28S rRNA partial and complete sequence            | <a href="#">Astrothelium mac...</a>  | 360        | 433         | 92%         | 1e-94   | 83.61%     | 784      | <a href="#">LC127384.1</a> |
| <input checked="" type="checkbox"/> <a href="#">Astrothelium macrocarpum</a> genes for 18S rRNA ITS1 5.8S rRNA ITS2 28S rRNA partial and complete sequence            | <a href="#">Astrothelium mac...</a>  | 360        | 433         | 92%         | 1e-94   | 83.61%     | 800      | <a href="#">LC127383.1</a> |
| <input checked="" type="checkbox"/> <a href="#">Astrothelium macrocarpum</a> genes for 18S rRNA ITS1 5.8S rRNA ITS2 28S rRNA partial and complete sequence            | <a href="#">Astrothelium mac...</a>  | 360        | 433         | 92%         | 1e-94   | 83.61%     | 800      | <a href="#">LC127382.1</a> |
| <input checked="" type="checkbox"/> <a href="#">Astrothelium macrocarpum</a> TNS.YO12392 genes for 18S rRNA ITS1 5.8S rRNA ITS2 28S rRNA partial and com...           | <a href="#">Astrothelium mac...</a>  | 356        | 425         | 85%         | 2e-93   | 85.11%     | 810      | <a href="#">LC573991.1</a> |
| <input checked="" type="checkbox"/> <a href="#">Astrothelium macrocarpum</a> genes for 18S rRNA ITS1 5.8S rRNA ITS2 28S rRNA partial and complete sequence            | <a href="#">Astrothelium mac...</a>  | 355        | 424         | 92%         | 6e-93   | 83.33%     | 799      | <a href="#">AB759880.1</a> |
| <input checked="" type="checkbox"/> <a href="#">Astrothelium macrocarpum</a> voucher HMAS-LQ146701 small subunit ribosomal RNA gene partial sequence internal...      | <a href="#">Astrothelium mac...</a>  | 355        | 424         | 92%         | 6e-93   | 83.33%     | 800      | <a href="#">MT948054.1</a> |
| <input checked="" type="checkbox"/> <a href="#">Astrothelium macrocarpum</a> TNS.YO12285 genes for 18S rRNA ITS1 5.8S rRNA ITS2 28S rRNA partial and com...           | <a href="#">Astrothelium mac...</a>  | 351        | 424         | 91%         | 7e-92   | 83.38%     | 726      | <a href="#">LC573990.1</a> |
| <input checked="" type="checkbox"/> <a href="#">Uncultured Capnodiales</a> clone HJ93 18S ribosomal RNA gene partial sequence internal transcribed spacer 1 5.8S...   | <a href="#">uncultured Capno...</a>  | 332        | 332         | 66%         | 7e-86   | 85.29%     | 617      | <a href="#">JX317516.1</a> |
| <input checked="" type="checkbox"/> <a href="#">Marcelaria cumingii</a> genes for 18S rRNA ITS1 5.8S rRNA ITS2 28S rRNA partial and complete sequence isolat...       | <a href="#">Marcelaria cumingii</a>  | 312        | 312         | 67%         | 6e-80   | 83.12%     | 555      | <a href="#">LC034179.1</a> |
| <input checked="" type="checkbox"/> <a href="#">Marcelaria cumingii</a> genes for 18S rRNA ITS1 5.8S rRNA ITS2 28S rRNA partial and complete sequence isolat...       | <a href="#">Marcelaria cumingii</a>  | 303        | 303         | 67%         | 3e-77   | 82.50%     | 556      | <a href="#">LC034180.1</a> |
