# Supplementary material for: Morphological and Phylogenetic Characterizations Reveal Five New Species of Astrothelium (Trypetheliales, Ascomycota) from China
Source: MDPI journal article supplement (doi:10.3390/jof8100994), 2022-09-22
Supplement: s1 [file s1]

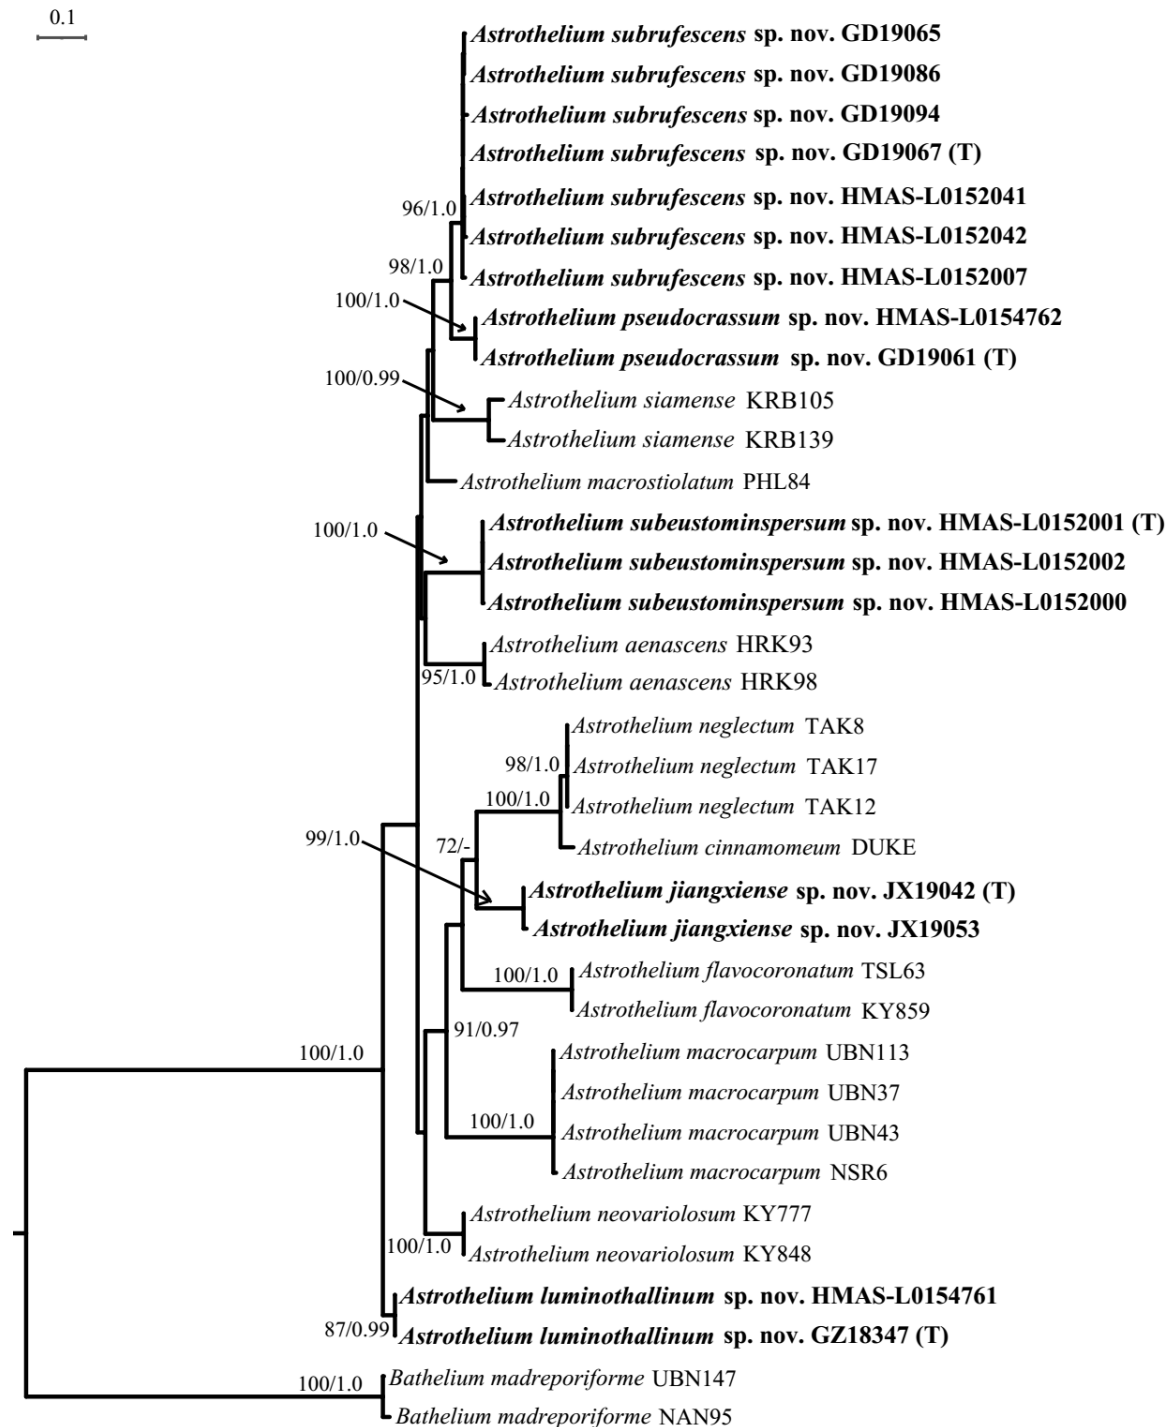

**Supplementary 6.** ML tree showing the internal phylogeny of *Astrothelium* based on ITS with an alignment length of 455 bp. Maximum likelihood bootstrap support above 70% (left) and Bayesian inference posterior probabilities above 0.95 (right) are shown at nodes (ML-BP/B-PP). Terminals in boldface indicate newly generated sequences for this study. The type specimens in the phylogenetic tree were labeled by letter T.
