# Supplementary material for: Morphological and Phylogenetic Characterizations Reveal Five New Species of Astrothelium (Trypetheliales, Ascomycota) from China
Source: MDPI journal article supplement (doi:10.3390/jof8100994), 2022-09-22
Supplement: s1 [file s1]

**Table S1.** Specimens used in the phylogenetic analysis.

| Species                                   | Specimen No.          | GenBank No.     |                 |                 |
|-------------------------------------------|-----------------------|-----------------|-----------------|-----------------|
|                                           |                       | ITS             | LSU             | RPB1            |
| <i>Astrothelium aenascens</i>             | HRK93                 | LC127385        | LC127403        | LC128036        |
| <i>A. aenascens</i>                       | HRK98                 | LC127386        | LC127404        | LC128037        |
| <i>A. aeneum</i>                          | MPN302                |                 | KX215606        |                 |
| <i>A. cinereorosellum</i>                 | MPN199C               |                 | KX215610        |                 |
| <i>A. cinnamomeum</i>                     | DUKE                  | DQ782839        | AY584652        | DQ782824        |
| <i>A. confusum</i>                        |                       |                 | GU327710        |                 |
| <i>A. crassum</i>                         | MPN335                |                 | KM453761        |                 |
| <i>A. croceum</i>                         | MPN55                 |                 | KX215611        |                 |
| <i>A. degenerans</i>                      | MPN266                |                 | KX215613        |                 |
| <i>A. degenerans</i>                      | F16657                |                 | KX215612        |                 |
| <i>A. eustomum</i>                        | MPN258                |                 | KM453762        |                 |
| <i>A. flavocoronatum</i>                  | KY859                 | LC127381        | LC127398        | LC128030        |
| <i>A. flavocoronatum</i>                  | TSL63                 | AB758900        | LC127397        | LC128031        |
| <i>A. floridanum</i>                      | MPN216                |                 | KX215618        |                 |
| <i>A. floridanum</i>                      | MPN214                |                 | KX215617        |                 |
| <i>A. galbineum</i>                       | MPN260                |                 | KM453763        |                 |
| <i>A. grossum</i>                         | MPN751                |                 | KX215623        |                 |
| <i>A. grossum</i>                         | MPN657                |                 | KX215622        |                 |
| <i>A. grossum</i>                         | MPN264                |                 | KX215621        |                 |
| <i>A. grossum</i>                         | MPN263                |                 | KX215620        |                 |
| <i>A. grossum</i>                         | MPN262                |                 | KX215619        |                 |
| <b><i>A. jiangxiense</i> sp. nov.</b>     | <b>LCUF JX19042</b>   | <b>OP289105</b> | <b>OP289121</b> | <b>OP313732</b> |
| <b><i>A. jiangxiense</i> sp. nov.</b>     | <b>LCUF JX19053</b>   | <b>OP289106</b> | <b>OP289122</b> | <b>OP313733</b> |
| <i>A. kunzei</i>                          | MPN203B               |                 | KX215625        |                 |
| <i>A. kunzei</i>                          | MPN201B               |                 | KX215624        |                 |
| <i>A. leucoconicum</i>                    | MPN42                 |                 | KM453764        |                 |
| <i>A. leucosessile</i>                    | MPN58C                |                 | KX215627        |                 |
| <i>A. leucosessile</i>                    | MPN265                |                 | KX215626        |                 |
| <b><i>A. luminothallinum</i> sp. nov.</b> | <b>GZ18347</b>        | <b>OP289110</b> | <b>OP289123</b> | --              |
| <b><i>A. luminothallinum</i> sp. nov.</b> | <b>HMAS-L 0154761</b> | <b>OP289109</b> | --              | --              |
| <i>A. macrocarpum</i>                     | MPN57C                |                 | KX215631        |                 |
| <i>A. macrocarpum</i>                     | MPN339                |                 | KX215630        |                 |
| <i>A. macrocarpum</i>                     | MPN261                |                 | KX215629        |                 |
| <i>A. macrocarpum</i>                     | MPN131                |                 | KX215628        |                 |
| <i>A. macrocarpum</i>                     | NSR6                  | AB759880        | LC127402        | LC128033        |
| <i>A. macrocarpum</i>                     | UBN37                 | LC127384        | LC127400        | LC128032        |
| <i>A. macrocarpum</i>                     | UBN43                 | LC127383        | LC127399        | LC128034        |
| <i>A. macrocarpum</i>                     | UBN113                | LC127382        | LC127401        | LC128035        |
| <i>A. macrostiolatum</i>                  | PHL84                 | LC127389        | LC127407        | LC128040        |
| <i>A. megaspermum</i>                     | MPN234                |                 | KX215633        |                 |
| <i>A. megaspermum</i>                     | MPN138                |                 | KX215632        |                 |
| <i>A. meristosporum</i>                   | MPN198                |                 | KX215634        |                 |
| <i>A. neogalbineum</i>                    | MPN51                 |                 | KX215635        |                 |
| <i>A. neoinspersum</i>                    | MPN61C                |                 | KX215636        |                 |
| <i>A. neglectum</i>                       | TAK8                  | LC127392        | LC127410        | LC128043        |
| <i>A. neglectum</i>                       | TAK12                 | LC127393        | LC127411        | LC128044        |
| <i>A. neglectum</i>                       | TAK17                 | LC127394        | LC127412        | LC128045        |
| <i>A. neovariolosum</i>                   | KY777                 | LC127390        | LC127408        | LC128041        |
| <i>A. neovariolosum</i>                   | KY848                 | LC127391        | LC127409        | LC128042        |
| <i>A. nicaraguense</i>                    | MPN213                |                 | KX215639        |                 |
| <i>A. nicaraguense</i>                    | MPN211                |                 | KX215638        |                 |
| <i>A. nicaraguense</i>                    | MPN205                |                 | KX215637        |                 |
| <i>A. nitidiusculum</i>                   | MPN768                |                 | KX215640        |                 |
| <i>A. aff. norisianum</i>                 | MPN23B                |                 | KX215607        |                 |
| <i>A. aff. obscurum</i>                   | MPN194                |                 | KX215608        |                 |

|                                       |                       |                 |                 |                 |
|---------------------------------------|-----------------------|-----------------|-----------------|-----------------|
| <i>A. obiectum</i>                    | MPN422                |                 | KM453767        |                 |
| <i>A. phlyctaena</i>                  | MPN386                |                 | KX215644        |                 |
| <i>A. phlyctaena</i>                  | MPN381                |                 | KX215643        |                 |
| <i>A. phlyctaena</i>                  | MPN376                |                 | KX215642        |                 |
| <i>A. phlyctaena</i>                  | MPN373                |                 | KX215641        |                 |
| <i>A. pseudocrassum</i> sp. nov.      | <b>LCUF GD19061</b>   | <b>OP289108</b> | <b>OP289125</b> | <b>OP313735</b> |
| <i>A. pseudocrassum</i> sp. nov.      | <b>HMAS-L 0154762</b> | <b>OP289107</b> | <b>OP289124</b> | <b>OP313734</b> |
| <i>A. robustum</i>                    | MPN223                |                 | KX215649        |                 |
| <i>A. robustum</i>                    | MPN222                |                 | KX215648        |                 |
| <i>A. robustum</i>                    | MPN221                |                 | KX215647        |                 |
| <i>A. robustum</i>                    | MPN212                |                 | KX215646        |                 |
| <i>A. robustum</i>                    | MPN209                |                 | KX215645        |                 |
| <i>A. cf. robustum</i>                | MPN754                |                 | KM453760        |                 |
| <i>A. rufescens</i>                   | MPN346                |                 | KX215652        |                 |
| <i>A. rufescens</i>                   | MPN345                |                 | KX215651        |                 |
| <i>A. rufescens</i>                   | MPN143                |                 | KX215650        |                 |
| <i>A. siamense</i>                    | KRB105                | LC127387        | LC127405        | LC128038        |
| <i>A. siamense</i>                    | KRB139                | LC127388        | LC127406        | LC128039        |
| <i>A. sanguinarium</i>                | MPN767                |                 | KX215654        |                 |
| <i>A. sanguinarium</i>                | MPN766                |                 | KX215653        |                 |
| <i>A. aff. scorioides</i>             | MPN703                |                 | KM453765        |                 |
| <i>A. scoria</i>                      | MPN310                |                 | KX215655        |                 |
| <i>A. scorioides</i>                  | MPN770                |                 | KM453766        |                 |
| <i>A. aff. sepultum</i>               | MPN229                |                 | KX215609        |                 |
| <i>A. sp.</i>                         | MPN96                 |                 | KX215614        |                 |
| <i>A. sp.</i>                         | MPN390                |                 | KX215658        |                 |
| <i>A. sp.</i>                         | MPN162                |                 | KX215657        |                 |
| <i>A. sp.</i>                         | MPN133                |                 | KX215656        |                 |
| <i>A. subendochryseum</i>             | MPN202B               |                 | KX215659        |                 |
| <i>A. subinterjectum</i>              | MPN157                |                 | KX215660        |                 |
| <i>A. subeustominspersum</i> sp. nov. | <b>HMAS-L 0152000</b> | <b>OP289118</b> | <b>OP289126</b> | <b>OP313736</b> |
| <i>A. subeustominspersum</i> sp. nov. | <b>HMAS-L 0152001</b> | <b>OP289119</b> | <b>OP289127</b> | <b>OP313737</b> |
| <i>A. subeustominspersum</i> sp. nov. | <b>HMAS-L 0152002</b> | <b>OP289120</b> | <b>OP289128</b> | <b>OP313738</b> |
| <i>A. subrufescens</i> sp. nov.       | <b>GD19065</b>        | <b>OP289111</b> | --              | --              |
| <i>A. subrufescens</i> sp. nov.       | <b>GD19067</b>        | <b>OP289112</b> | <b>OP289129</b> | --              |
| <i>A. subrufescens</i> sp. nov.       | <b>GD19086</b>        | <b>OP289113</b> | <b>OP289130</b> | --              |
| <i>A. subrufescens</i> sp. nov.       | <b>GD19094</b>        | <b>OP289114</b> | --              | --              |
| <i>A. subrufescens</i> sp. nov.       | <b>HMAS-L 0152007</b> | <b>OP289115</b> | --              | --              |
| <i>A. subrufescens</i> sp. nov.       | <b>HMAS-L 0152041</b> | <b>OP289116</b> | --              | --              |
| <i>A. subrufescens</i> sp. nov.       | <b>HMAS-L 0152042</b> | <b>OP289117</b> | --              | --              |
| <i>A. subscoria</i>                   | MPN325                |                 | KX215661        |                 |
| <i>A. variolosum</i>                  | MPN41                 |                 | KX215662        |                 |
| <i>A. variolosum</i>                  | MPN43                 |                 | KM453768        |                 |
| <i>A. versicolor</i>                  | MPN259                |                 | KM453769        |                 |
| <i>Bathelium madreporiforme</i>       | NAN95                 | LC127396        | LC127414        | LC128047        |
| <i>B. madreporiforme</i>              | UBN147                | LC127395        | LC127413        | LC128046        |

<sup>1</sup> The new sequences generated in this study were in bold.
